# Supplementary material for: Metoprolol Inhibits Developmental Brain Sterol Biosynthesis in Mice
Source: Biomolecules. 2022 Aug 31;12(9):1211. doi: 10.3390/biom12091211 (PMC9496459; doi:10.3390/biom12091211)
Supplement: Supplementary file 1 [file biomolecules-12-01211-s001.zip › biomolecules-1871079-supplementary.pdf]

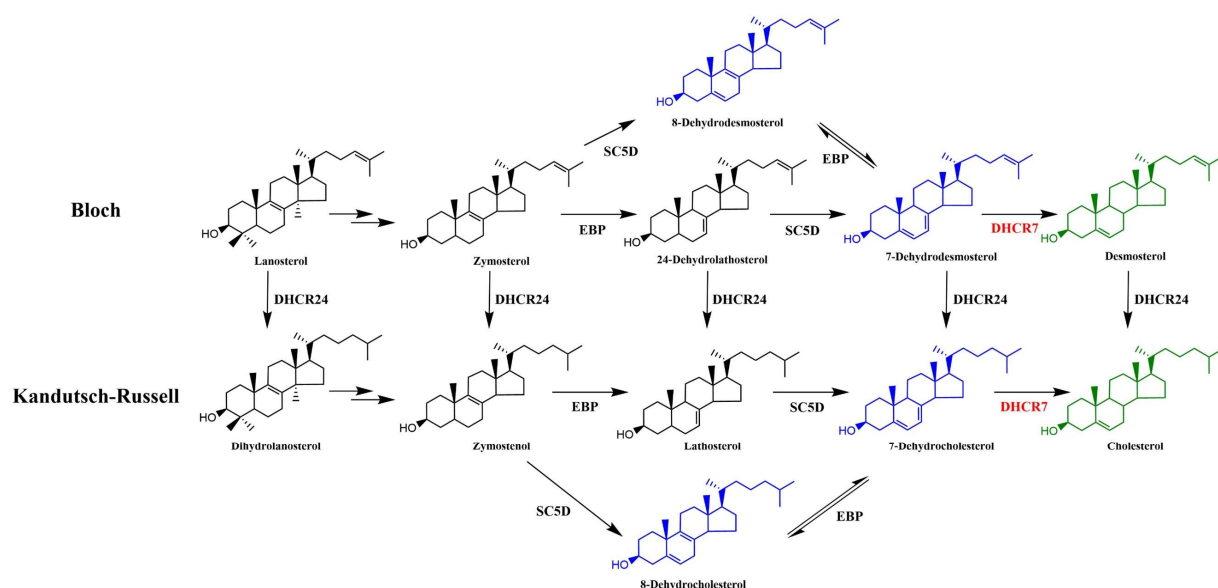

**Figure S1. Post-lanosterol cholesterol biosynthesis pathway.** Note that DHCR7 (red) is essential for CHOL synthesis though both the Kandutsch-Russell (bottom) and Bloch (top) arms, and that inhibition DHCR7 inhibition result in reduction of product (DES, CHOL; green) and accumulation of precursors (7-DHC, 8-DHC, 7-DHD and 8-DHD, blue).

| Name        | Rank by Rx, 2019 | Yearly Rx, 2019 | Cross BBB?                | Cross placenta? | $\beta$ -Selectivity                     | Known CNS side effects                                                                                                                                                                        |
|-------------|------------------|-----------------|---------------------------|-----------------|------------------------------------------|-----------------------------------------------------------------------------------------------------------------------------------------------------------------------------------------------|
| Metoprolol  | 5                | 74,578,817      | Yes                       | Yes             | $\beta_1$                                | Dizziness (2% to 10%), fatigue (1% to 10%)                                                                                                                                                    |
| Carvedilol  | 33               | 20,602,256      | Likely yes based off logP | Yes             | Non-selective, also $\alpha$ -adrenergic | Dizziness (2% to 32%), fatigue (24%)                                                                                                                                                          |
| Atenolol    | 39               | 18,091,488      | Yes                       | Yes             | $\beta_1$                                | Fatigue ( $\leq 26\%$ ), dizziness (1% to 13%), depression ( $\leq 12\%$ )                                                                                                                    |
| Propranolol | 82               | 9,277,061       | Yes                       | Yes             | Non-selective                            | Sleep disorder (infants: 16% to 18%), Agitation (infants: 5% to 9%), dizziness (4% to 7%), drowsiness (infants: 5%), fatigue (5% to 7%), irritability (infants: 6%), nightmares (infants: 6%) |
| Nebivolol   | 191              | 3,061,887       | Yes                       | Yes             | $\beta_1$                                | Headache (6% to 9%), fatigue (dose-related; 2% to 5%)                                                                                                                                         |
| Labetalol   | 198              | 2,825,281       | Negligible amounts        | Yes             | Non-selective                            | Dizziness (1% to 20%), fatigue (1% to 11%)                                                                                                                                                    |

**Figure S2. Prescription data, action and CNS-related side effects of investigated beta-blockers.**

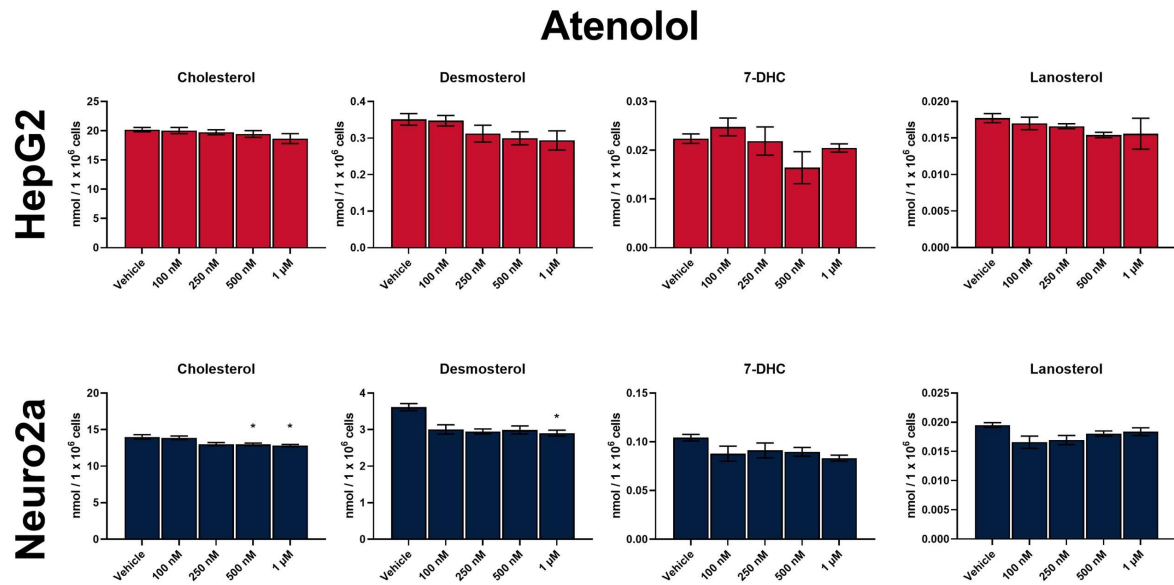

**Figure S3. Dose-dependent sterol response of HepG2 and Neuro2a cells treated with atenolol.** Values reported as nmol/million cells. Statistical significance: \* $p < 0.05$ ; \*\* $p < 0.01$ ; \*\*\* $p < 0.001$ ; \*\*\*\* $p < 0.0001$  vs. vehicle treatment.

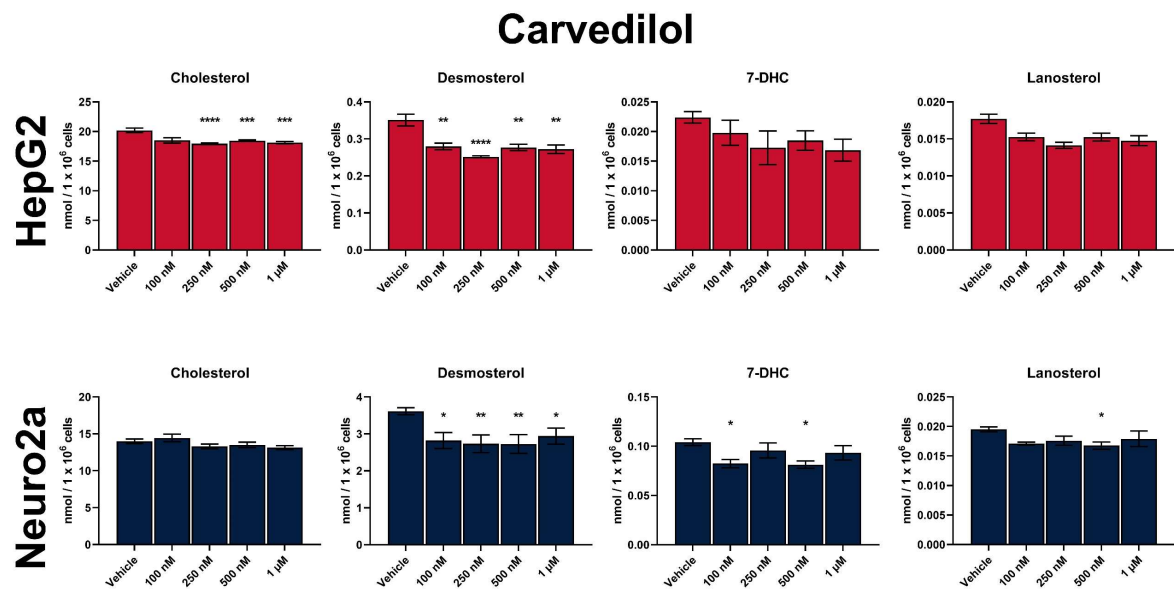

**Figure S4. Dose-dependent sterol response of HepG2 and Neuro2a cells treated with carvedilol.** Values reported as nmol/million cells. Statistical significance: \* $p < 0.05$ ; \*\* $p < 0.01$ ; \*\*\* $p < 0.001$ ; \*\*\*\* $p < 0.0001$  vs. vehicle treatment.

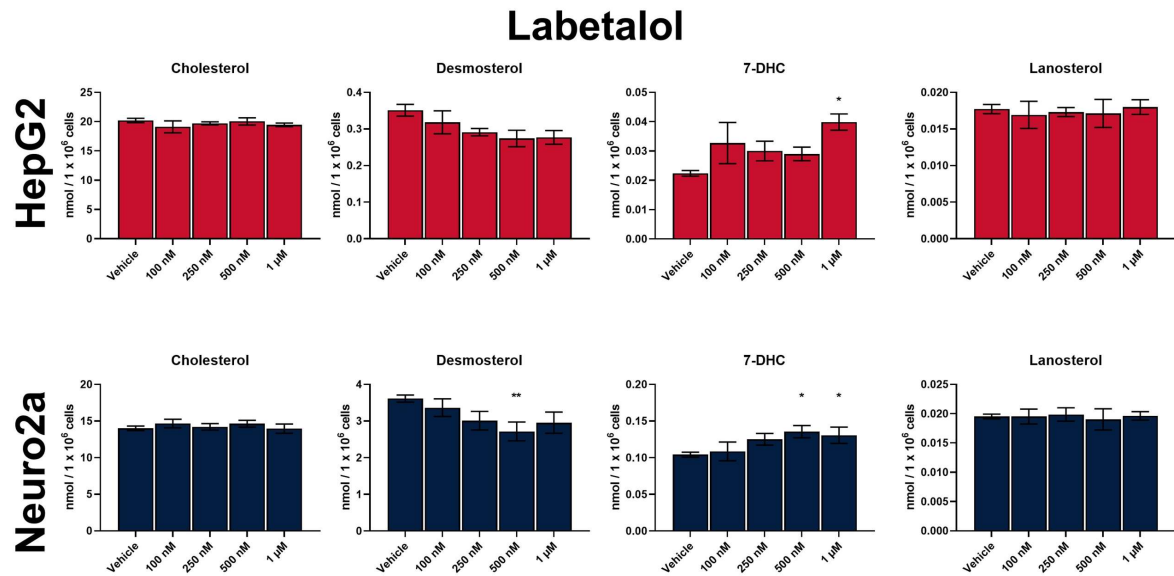

**Figure S5. Dose-dependent sterol response of HepG2 and Neuro2a cells treated with labetalol.** Values reported as nmol/million cells. Statistical significance: \* $p < 0.05$ ; \*\* $p < 0.01$ ; \*\*\* $p < 0.001$ ; \*\*\*\* $p < 0.0001$  vs. vehicle treatment.

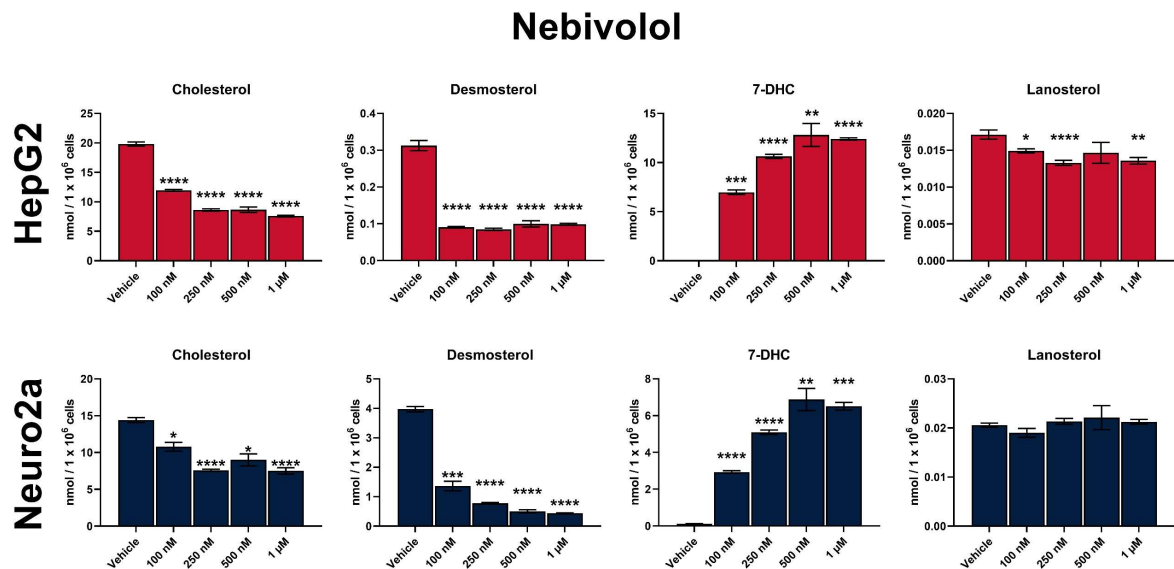

**Figure S6. Dose-dependent sterol response of HepG2 and Neuro2a cells treated with nebivolol.** Values reported as nmol/million cells. Statistical significance: \* $p < 0.05$ ; \*\* $p < 0.01$ ; \*\*\* $p < 0.001$ ; \*\*\*\* $p < 0.0001$  vs. vehicle treatment.

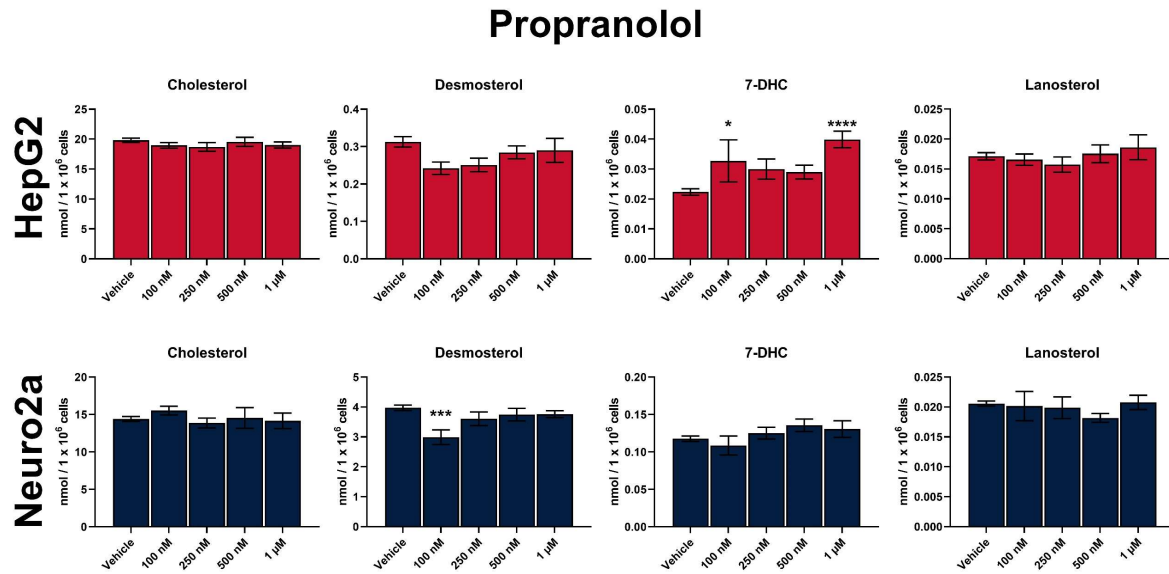

**Figure S7. Dose-dependent sterol response of HepG2 and Neuro2a cells treated with propranolol.** Values reported as nmol/million cells. Statistical significance: \* $p < 0.05$ ; \*\* $p < 0.01$ ; \*\*\* $p < 0.001$ ; \*\*\*\* $p < 0.0001$  vs. vehicle treatment.

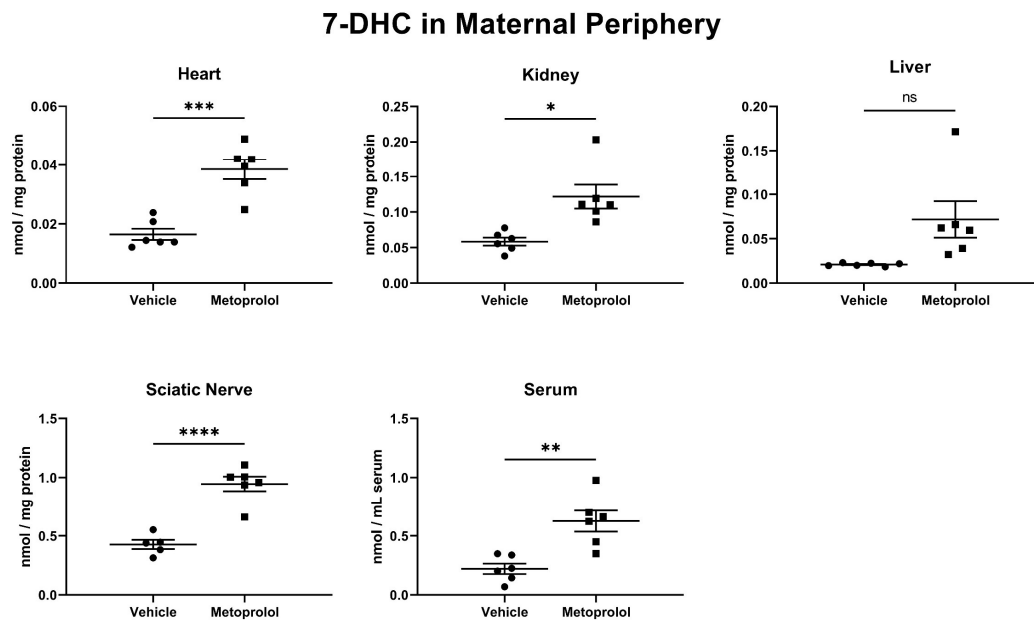

**Figure S8. Short-term MTP treatment elevates 7-DHC levels in the peripheral tissues of pregnant mouse dams.** Pregnant mice were treated with 35 mg/kg MTP from E12 to E19. Dam tissues were analyzed for sterol content by LC-MS/MS. Statistical significance: \*\* $p < 0.01$ ; \*\*\* $p < 0.001$ ; \*\*\*\* $p < 0.0001$  vs. vehicle

treatment. **Note** that the 7-DHC elevation is relatively uniform, and less robust than the elevations seen in the offspring tissues.

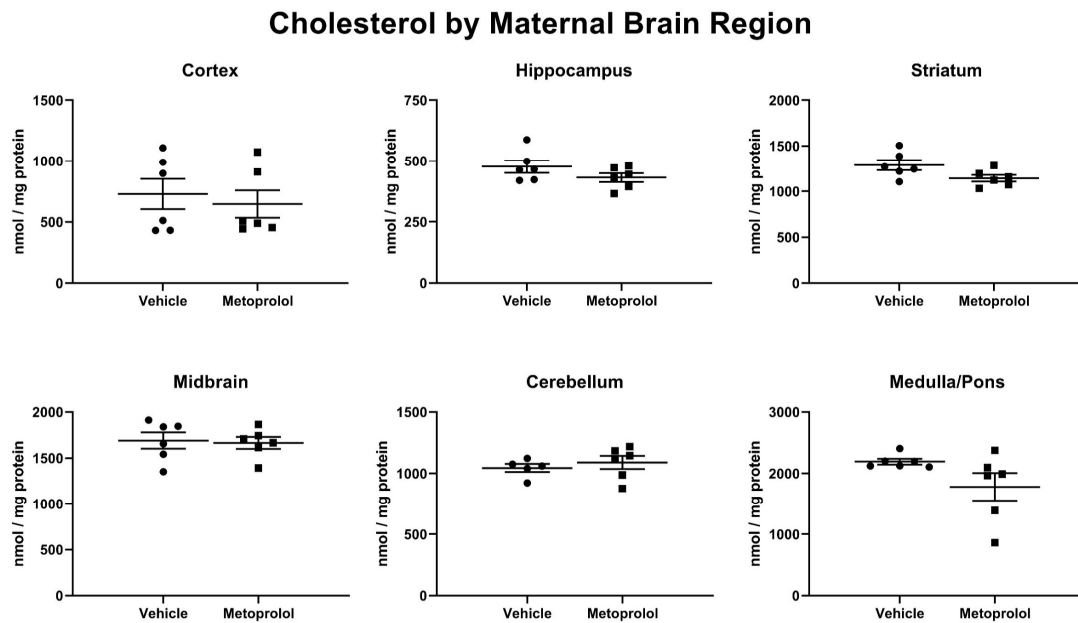

**Figure S9. Short-term MTP treatment has no significant effect on cholesterol levels in the brain of pregnant mouse dams.** Pregnant mice were treated with 35 mg/kg MTP from E12 to E19. Dam brains were analyzed for sterol content by LC-MS/MS. Statistical significance: \*\* $p < 0.01$ ; \*\*\* $p < 0.001$ ; \*\*\*\* $p < 0.0001$  vs. vehicle treatment. **Note** that CHOL baseline levels in the vehicle-treated animals are different across the brain regions, and that cholesterol levels are unchanged by short-term MTP treatment.

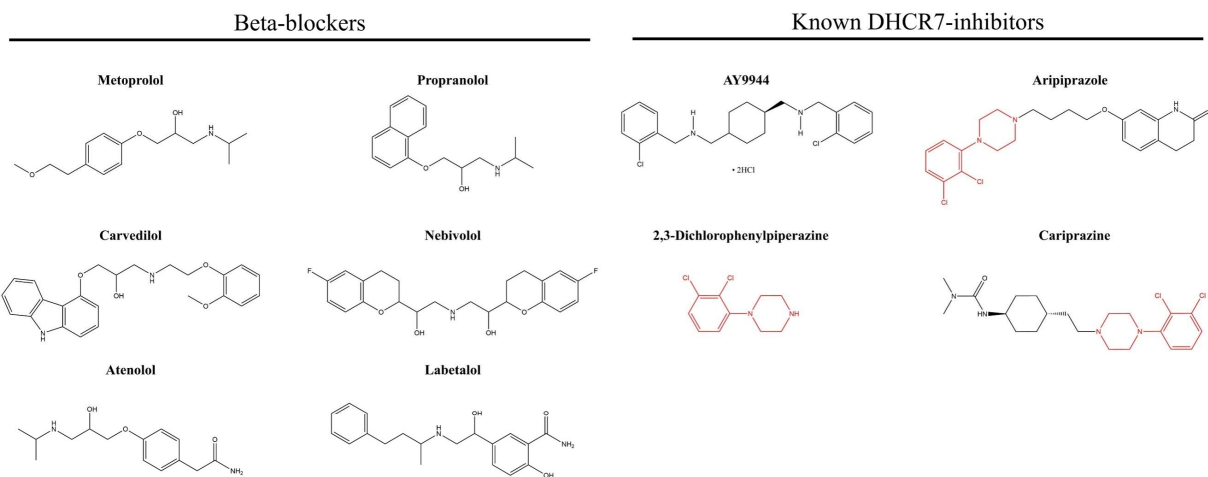

**Figure S10. Chemical structures of beta-blockers and known DHCR7 inhibitors.** AY9944 is a potent DHCR7 inhibitor commonly used to recapitulate SLOS phenotype in mice. Previous studies have identified aripiprazole, cariprazine and their shared 2,3-dichlorophenylpiperazine moiety (red) as DHCR7 inhibitors. The six beta-blockers we tested do not appear to share this moiety, suggesting that there are multiple classes of chemical structures that might lead to DHCR7 inhibition/ 7-DHC elevation.
